# Supplementary material for: A pan-cancer transcriptome analysis identifies replication fork and innate immunity genes as modifiers of response to the CHK1 inhibitor prexasertib
Source: PubMed Central journal article supplement (PMC6980627; doi:10.18632/oncotarget.27400), 2020-01-21
Supplement: oncotarget-11-216-s001.pdf [file oncotarget-11-216-s001.pdf]

# A pan-cancer transcriptome analysis identifies replication fork and innate immunity genes as modifiers of response to the CHK1 inhibitor prexasertib

## SUPPLEMENTARY MATERIALS

### REFERENCE

1. Gong X, Litchfield LM, Webster Y, Chio LC, Wong SS, Stewart TR, Dowless M, Dempsey J, Zeng Y, Torres R, Boehnke K, Mur C, Marugan C, et al. Genomic Aberrations

that Activate D-type Cyclins Are Associated with Enhanced Sensitivity to the CDK4 and CDK6 Inhibitor Abemaciclib. *Cancer Cell*. 2017; 32:761–76.e6. <https://doi.org/10.1016/j.ccell.2017.11.006>. [PubMed]

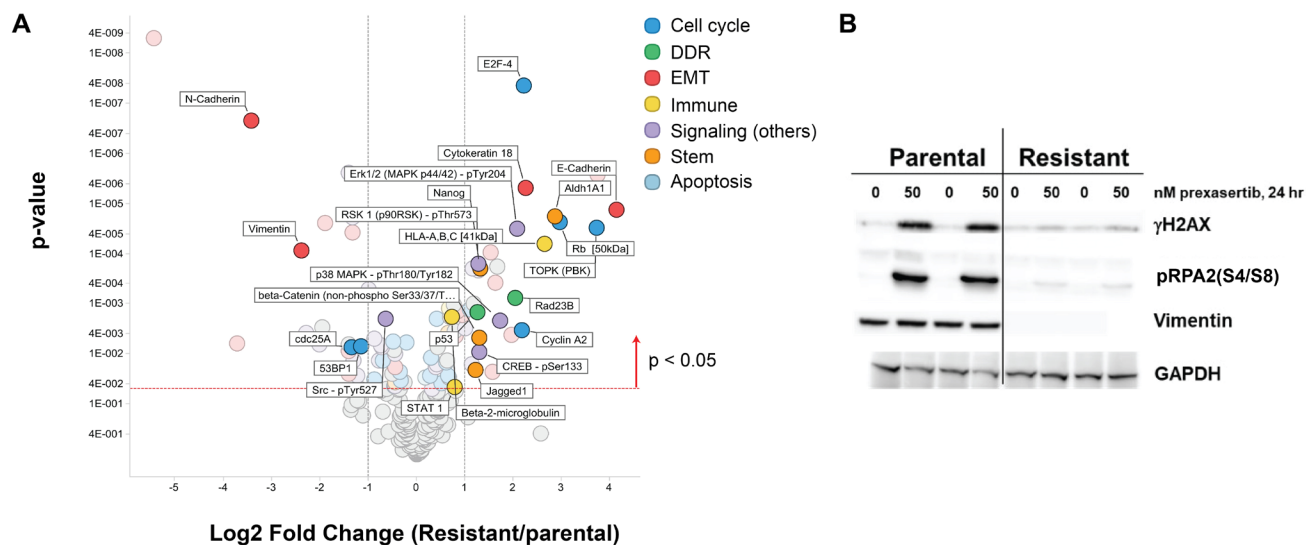

Supplementary Figure 1: Proteomic profile of parental and prexasertib-resistant NCI-H520 tumor lines. Protein levels measured from cellular extracts using Digiwest technology (A) or Western blots (B).

**A**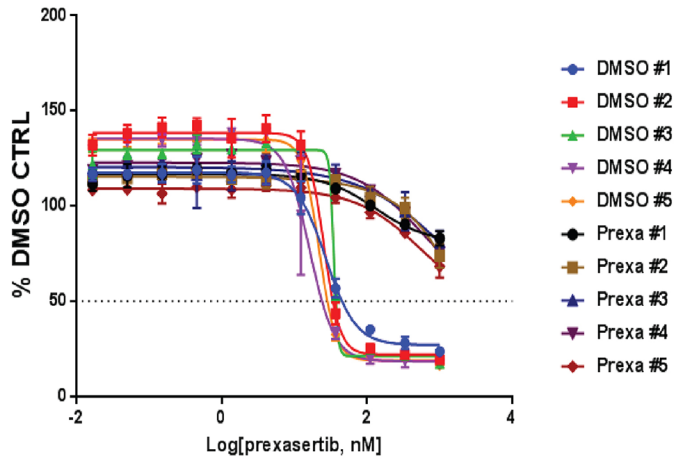

|                  | DMSO #1 | DMSO #2 | DMSO #3 | DMSO #4 | DMSO #5 | Prexa #1 | Prexa #2 | Prexa #3 | Prexa #4 | Prexa #5 |
|------------------|---------|---------|---------|---------|---------|----------|----------|----------|----------|----------|
| IC <sub>50</sub> | 53.54   | 29.35   | 36.42   | 21.38   | 25.82   | 4142     | 1873     | 2882     | 1808     | 1896     |

**B**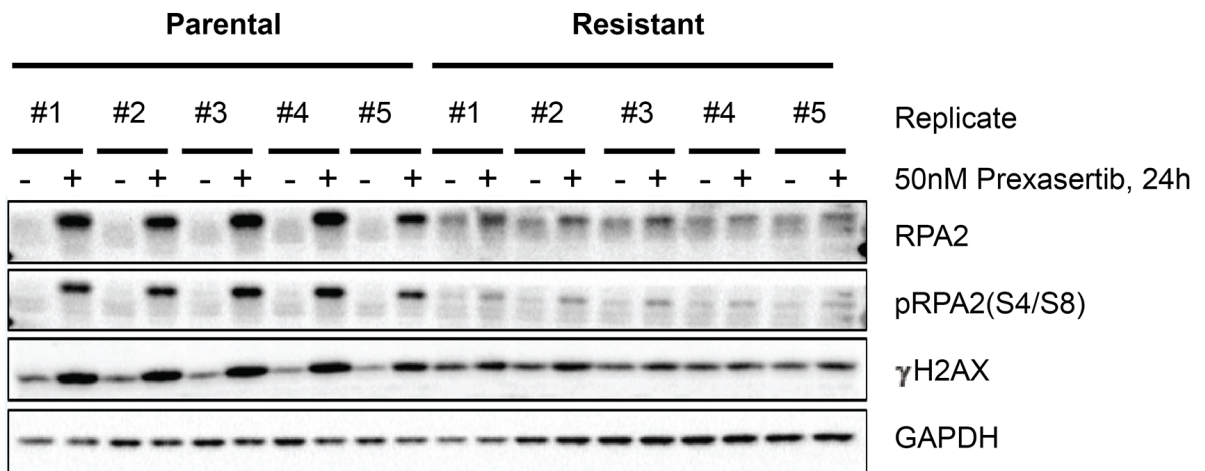

**Supplementary Figure 2: Phenotypic characterization of prexasertib resistance in the aRMS tumor line Rh41.** (A) IC<sub>50</sub> determination using a cell viability assay (Cell Titer Glow) in 5 independent cultures of Rh41 and their corresponding prexasertib-resistant models with corresponding IC<sub>50</sub> values. (B) Levels of replication stress (pRPA2) and DNA damage (γH2AX) in control (DMSO) or drug-treated parental or drug-resistant cultures.

## NCI H520 siRNA Knockdown

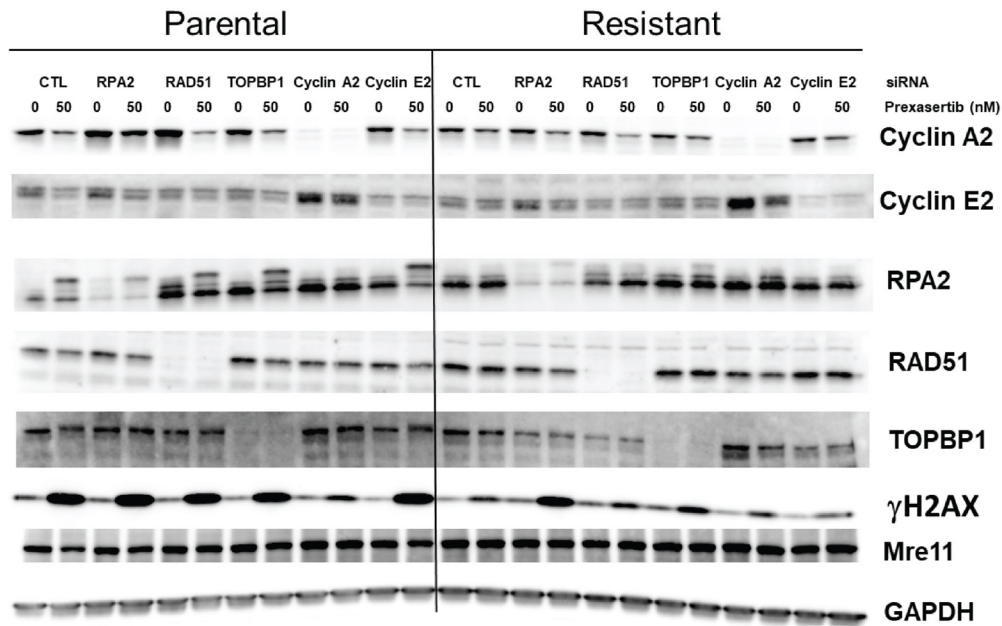

**Supplementary Figure 3: Proteomic analysis of siRNA-treated NCI-H520 tumor line.** Effect on the levels of a marker of DNA damage ( $\gamma$ H2AX) and Mre11A as a consequence of non-target (CTL) control or on-target (*RPA2*, *RAD51*, *TOPBP1*, *CCNA2*, *CCNE2*) established by Western blot in siRNA-treated NCI-H520 tumor line.

## OVCAR3 siRNA Knockdown

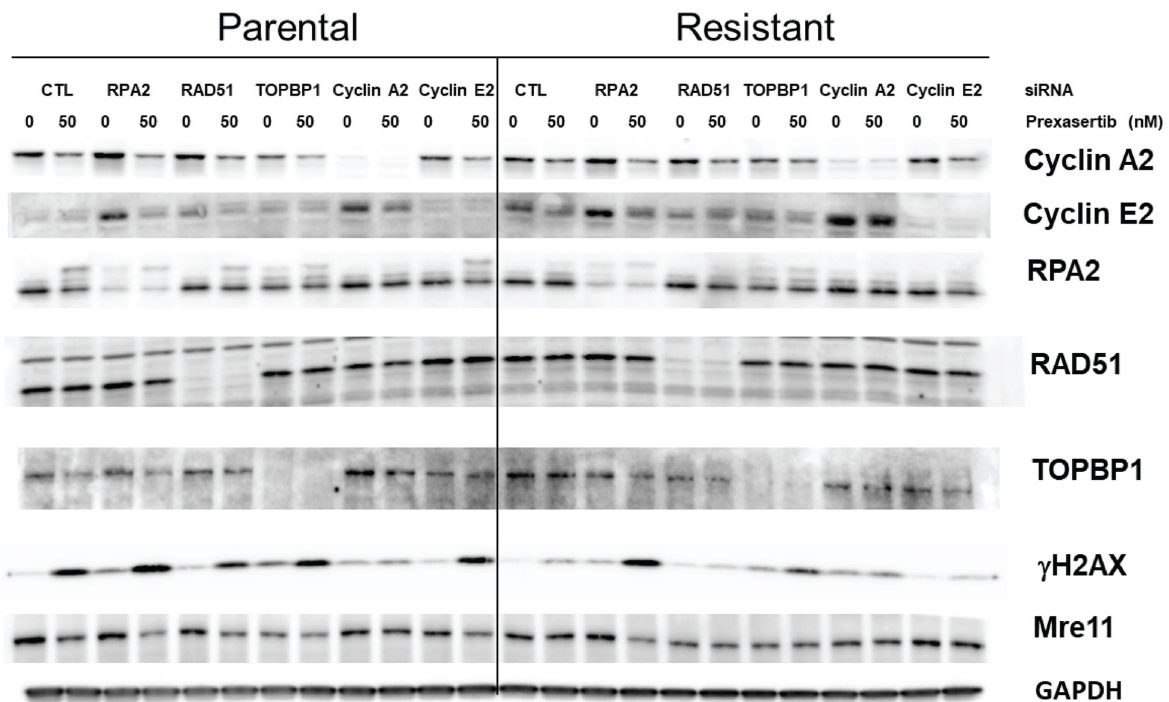

**Supplementary Figure 4: Proteomic analysis of siRNA-treated OVCAR-3 tumor line.** Effect on the levels of a marker of DNA damage ( $\gamma$ H2AX) and Mre11A as a consequence of non-target (CTL) control or on-target (*RPA2*, *RAD51*, *TOPBP1*, *CCNA2*, *CCNE2*) established by Western blot in siRNA-treated OVCAR-3 tumor line.

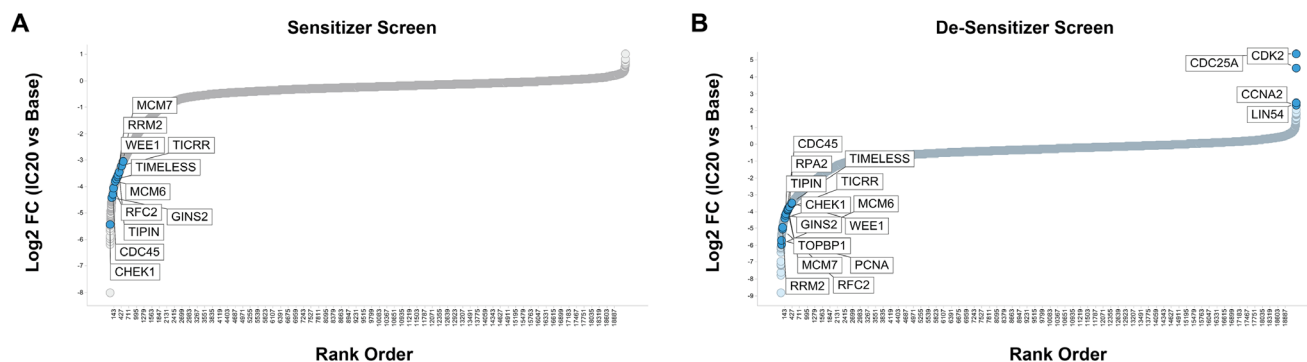

**Supplementary Figure 5: CRISPR screen on the ovarian tumor line OV90.** Genes having a sensitizing (A) or de-sensitizing effect (B) on prexasertib sensitivity upon knockout.

**Supplementary Table 1: Activity of prexasertib across a pan-cancer tumor cell line panel.** See Supplementary Table 1

**Supplementary Table 2: Association between gene expression and prexasertib sensitivity across pan-cancer tumor cell line panel.** See Supplementary Table 2

**Supplementary Table 3: Association between gene expression and prexasertib resistance across pan-cancer tumor cell line panel.** See Supplementary Table 3

**Supplementary Table 4: Activity of prexasertib in pediatric and adult sarcoma/neuroblastoma PDX cohort and molecular features.** See Supplementary Table 4

**Supplementary Table 5: Association between gene expression and prexasertib sensitivity in sarcoma/neuroblastoma PDX cohort.** See Supplementary Table 5

**Supplementary Table 6: Association between gene expression and prexasertib resistance in sarcoma/neuroblastoma PDX cohort.** See Supplementary Table 6

**Supplementary Table 7: Differentially expressed genes between parental and prexasertib-resistant NCI-H520 tumor cell lines.** See Supplementary Table 7

**Supplementary Table 8: Proteomic profiling of parental and prexasertib-resistant NCI-H520 tumor cell lines.** See Supplementary Table 8

**Supplementary Table 9: Differentially expressed genes between parental and prexasertib-resistant Rh41 tumor cell lines.** See Supplementary Table 9

**Supplementary Table 10: Differentially expressed genes between resistant (Res) and parental (Par) and between re-sensitized (Re-sen) and resistant (Res) SJC-Rh30 tumor cell lines.** See Supplementary Table 10

**Supplementary Table 11: Differentially expressed genes between parental and prexasertib-resistant ovarian tumor cell lines.** See Supplementary Table 11

**Supplementary Table 12: Expression of immunity genes in tumor models with acquired or intrinsic resistance to prexasertib.** See Supplementary Table 12

**Supplementary Table 13: Short-hairpin genomic screen for sensitizers in prexasertib-resistant NCI-H520 tumor line.** See Supplementary Table 13

**Supplementary Table 14: Short-hairpin genomic screen for de-sensitizers in parental NCI-H520 tumor line.** See Supplementary Table 14

**Supplementary Table 15: CRISPR genomic screen for de-sensitizers in OV90 ovarian tumor line.** See Supplementary Table 15

**Supplementary Table 16: List of tumor cell lines used in the current study**

| <b>Name</b> | <b>Histology</b>          | <b>Source</b> |
|-------------|---------------------------|---------------|
| NCI-H520    | Squamous Lung             | ATCC          |
| SJC-Rh30    | Alveolar Rhabdomyosarcoma | St Jude       |
| SJC-Rh41    | Alveolar Rhabdomyosarcoma | St Jude       |
| OV90        | Ovarian                   | ATCC          |
| OVSAHO      | Ovarian                   | ATCC          |
| EFO21       | Ovarian                   | ATCC          |
| OVCAR-3     | Ovarian                   | ATCC          |
| KURAMOCHI   | Ovarian                   | ATCC          |
| MDA-MB-468  | Breast                    | ATCC          |
| MDA-MB-231  | Breast                    | ATCC          |

**Supplementary Table 17: List of antibodies used in the current study**

| <b>Antibody</b>                         | <b>Vendor</b>  | <b>Cat #</b> | <b>Species</b> | <b>MW (Kda)</b> | <b>Dilution</b> |
|-----------------------------------------|----------------|--------------|----------------|-----------------|-----------------|
| ATM                                     | Cell Signaling | 2873         | Rabbit         | 350             | 1:1000          |
| ATR                                     | Cell Signaling | 2790         | Rabbit         | 250             | 1:500           |
| 53BP1                                   | Abcam          | ab21083      | Rabbit         | 220             | 1:1000          |
| BRCA1                                   | Cell Signaling | 14823        | Rabbit         | 207             | 1:1000          |
| Topo II a                               | Abcam          | ab52934      | Rabbit         | 174             | 1:2000          |
| pMCM2 (S40/41)                          | Bethyl         | A300-788A    | Rabbit         | 125             | 1:1500          |
| FANCD2                                  | Santa Cruz     | sc-20022     | Mouse          | 150             | 1:1000          |
| pRB                                     | BD             | 558385       | Mouse          | 110             | 1:1000          |
| E-Cadherin                              | Millipore      | 07-697       | Rabbit         | 106             | 1:1000          |
| Wee1                                    | Cell Signaling | 13084        | Rabbit         | 95              | 1:1000          |
| FBXW7                                   | Abcam          | ab171961     | Rabbit         | 79              | 1:1000          |
| Mre11                                   | Abcam          | ab214        | Mouse          | 75              | 1:1000          |
| p-CDC25A(S76)                           | MyBiosource    | MBS128525    | Rabbit         | 70              | 1:1000          |
| p-CDC25A(S178)                          | MyBiosource    | MBS9200987   | Rabbit         | 70              | 1:1000          |
| cdc25A                                  | Santa Cruz     | SC7389       | Mouse          | 67              | 1:500           |
| pCHK2 (T68)                             | Cell Signaling | 2661         | Rabbit         | 62              | 1:500           |
| p-cdc25c(S216)                          | Cell Signaling | 4901         | Rabbit         | 60              | 1:1000          |
| cdc45                                   | Santa Cruz     | SC20685      | Rabbit         | 60              | 1:1000          |
| Myt1                                    | Cell Signaling | 4282         | Rabbit         | 60 to 70        | 1:1000          |
| pChk1 (S296)                            | Cell Signaling | 90178        | Rabbit         | 56              | 1:1000          |
| PChk1 (S317)                            | Cell Signaling | 2344         | Rabbit         | 56              | 1:1000          |
| pChk1 (S345)                            | Cell Signaling | 2348         | Rabbit         | 56              | 1:1000          |
| Mus 81                                  | Abcam          | ab14387      | Rabbit         | 65              | 1:1000          |
| p-Chk2(Thr68)                           | Cell Signaling | 2661         | Rabbit         | 62              | 1:1000          |
| p-Chk2(S516)                            | Cell Signaling | 2669         | Rabbit         | 62              | 1:1000          |
| Cyclin B1                               | Cell Signaling | 4135         | Mouse          | 55              | 1:1000          |
| Chk1                                    | Santa Cruz     | SC8408       | Mouse          | 56              | 1:500           |
| Chk2                                    | Millipore      | 05-649       | Mouse          | 56              | 1:500           |
| Cyclin E                                | Abcam          | ab33911      | Rabbit         | 48-56           | 1:1000          |
| p-MEK1/2(Ser217/221)                    | Cell Signaling | 9154         | Rabbit         | 45              | 1:1000          |
| phospho-MAPK(ERK1/2)(Thr202/<br>Tyr204) | Cell Signaling | 4376         | Rabbit         | 42,44           | 1:2000          |
| SKP2                                    | Cell Signaling | 2652         | Rabbit         | 48              | 1:1000          |
| pNPM(T199)                              | Cell Signaling | 3541         | Rabbit         | 38              | 1:1000          |
| cdk2                                    | Millipore      | 05-596       | Mouse          | 33              | 1:1000          |
| p-CDK2(Y15)                             | Abcam          | ab76146      | Rabbit         | 34              | 1:1000          |
| p-cdc2(Tyr15)                           | Cell Signaling | 9111         | Rabbit         | 34              | 1:1000          |
| pCDK2(T160)                             | Cell Signaling | 2561         | Rabbit         | 33              | 1:1000          |
| pRPA32 (S4/S8)                          | Bethyl         | A300-245A    | Rabbit         | 32              | 1:1000          |
| pRPA32 (T21)                            | Abcam          | ab109394     | Rabbit         | 32              | 1:1000          |
| pRPA32 (S33)                            | Bethyl         | A300-246A-T  | Rabbit         | 32              | 1:1000          |
| RPA32                                   | Cell Signaling | 2208         | Rat            | 32              | 1:1000          |
| HAUS1                                   | Thermo         | MA5-22937    | Mouse          | 32              | 1:1000          |
| p27                                     | Cell Signaling | 2552         | Rabbit         | 27              | 1:1000          |
| pp27(T187)                              | Abcam          | ab75908      | Rabbit         | 27              | 1:500           |
| p21                                     | Cell Signaling | 2947         | Rabbit         | 21              | 1:2000          |
| gH2AX                                   | Millipore      | 05-636       | Mouse          | 17              | 1:5000          |
